# Supplementary material for: DNA Polymorphisms and mRNA Levels of Immune Biomarkers as Candidates for Inflammatory Postpartum Disorders Susceptibility in Italian Buffaloes
Source: MDPI journal article supplement (doi:10.3390/vetsci10090573), 2023-09-14
Supplement: s1 [file s1]

# Supplementary:

|                |                                                               |       |
|----------------|---------------------------------------------------------------|-------|
| XM_044936650.2 | CCGGCTTGGACAGCCTCTCTTGTACCTTCCGCCGGCCGGCCAGGCAGGGGCGGGACCTGA  | 60    |
| H              | CCGGCTTGGACAGCCTCTCTTGTACCTTCCGCCGGCCGGCCAGGCAGGGGCGGGACCTGA  | 60    |
| RD             | CCGGCTTGGACAGCCTCTCTTGTACCTTCCGCCGGCCGGCCAGGCAGGGGCGGGACCTGA  | 60    |
| *****          | *****                                                         | ***** |
| XM_044936650.2 | GCGTTTTACTTCCGGATCCACAGCTTAGACACCGGAAGCCGGATGTGAGAAGTTGGCAG   | 120   |
| H              | GCGTTTTACTTCCGGATCCACAGCTTAGACACCGGAAGCCGGATGTGAGAAGTTGGCAG   | 120   |
| RD             | GCGTTTTACTTCCGGATCCACAGCTTAGACACCGGAAGCCGGATGTGAGAAGTTGGCAG   | 120   |
| *****          | *****                                                         | ***** |
| XM_044936650.2 | CGGGAGAAGGGAAGGGCGGCAGCGGGAGAAGGGAAGGGCTACAGCGGAACCTCGGACTTTC | 180   |
| H              | CGGGAGAAGGGAAGGGCGGCAGCGGGAGAAGGGAAGGGCTACAGCGGAACCTCGGACTTTC | 180   |
| RD             | CGGGAGAAGGGAAGGGCGGCAGCGGGAGAAGGGAAGGGCTACAGCGGAACCTCGGACTTTC | 180   |
| *****          | *****                                                         | ***** |
| XM_044936650.2 | TCGGAGCGCCGGGGGTCCGAGGAACGCTCGGGGCCCGCGTTCCCGCCCTTCTCACGTGC   | 240   |
| H              | TCGGAGCGCCGGGGGTCCGAGGAACGCTCGGGGCCCGCGTTCCCGCCCTTCTCACGTGC   | 240   |
| RD             | TCGGAGCGCCGGGGGTCCGAGGAACGCTCGGGGCCCGCGTTCCCGCCCTTCTCACGTGC   | 240   |
| *****          | *****                                                         | ***** |
| XM_044936650.2 | GACCGACTCAGCTGACAGGCCCTGACGTGTTGGATGAGCAGGCCCCCTGGAAGAGTCCA   | 300   |
| H              | GACCGACTCAGCTGACAGGCCCTGACGTGTTGGATGAGCAGGCCCCCTGGAAGAGTCCA   | 300   |
| RD             | GACCGACTCAGCTGACAGGCCCTGACGTGTTGGATGAGCAGGCCCCCTGGAAGAGTCCA   | 300   |
| *****          | *****                                                         | ***** |
| XM_044936650.2 | CTGTGTGAGATGGTGACAGCCGAGTGGCGGTCCGGCAGGGGACCAGGACATGCTGGGTGAA | 360   |
| H              | CTGTGTGAGATGGTGACAGCCGAGTGGCGGTCCGGCAGGGGACCAGGACATGCTGGGTGAA | 360   |
| RD             | CTGTGTGAGATGGTGACAGCCGAGTGGCGGTCCGGCAGGGGACCAGGACATGCTGGGTGAA | 360   |
| *****          | *****                                                         | ***** |
| XM_044936650.2 | GAGTCTTCTCTGGGGAAGCCAGCCATGCTCCATGTGCCTTCAGAGCAGGGCA          | 412   |
| H              | GAGTCTTCTCTGGGGAAGCCAGCCATGCTCCATGTGCCTTCAGAGCAGGGCA          | 412   |
| RD             | GAGTCTTCTCTGGGGAAGCCAGCCATGCTCCATGTGCCTTCAGAGCAGGGCA          | 412   |
| *****          | *****                                                         | ***** |

**Figure S1.** Analysis of nitrogenous bases matching for DNA in healthy and reproductive disorders affected buffaloes using GenBank gb|XM\_044936650.2| and *IKBKG* marker (412-bp) sequences.

|                |                                                               |       |
|----------------|---------------------------------------------------------------|-------|
| XM_025282898.3 | CTCATTTCCTCTGCAGAGTCTTCAGACAGCTGGTGCCGAAGTTTCAGGAACATCCTCCTC  | 60    |
| H              | CTCATTTCCTCTGCAGAGTCTTCAGACAGCTGGTGCCGAAGTTTCAGGAACATCCTCCTC  | 60    |
| RD             | CTCATTTCCTCTGCAGAGTCTTCAGACAGCTGGTGCCGAAGTTTCAGGAACATCCTCCTC  | 60    |
| *****          | *****                                                         | ***** |
| XM_025282898.3 | TCTTCAATCATGGCTTGTGGTCTGGTCCGACCAACCTGAATCTCAAACCTGGGGAGTGC   | 120   |
| H              | TCTTCAATCATGGCTTGTGGTCTGGTCCGACCAACCTGAATCTCAAACCTGGGGAGTGC   | 120   |
| RD             | TCTTCAATCATGGCTTGTGGTCTGGTCCGACCAACCTGAATCTCAAACCTGGGGAGTGC   | 120   |
| *****          | *****                                                         | ***** |
| XM_025282898.3 | CTCAGAGTGCGGGGCGAGGTGGCCGACAGCCCAAGAGCTTCTTGCTGAACCTGGGCAAA   | 180   |
| H              | CTCAGAGTGCGGGGCGAGGTGGCCGACAGCCCAAGAGCTTCTTGCTGAACCTGGGCAAA   | 180   |
| RD             | CTCAGAGTGCGGGGCGAGGTGGCCGACAGCCCAAGAGCTTCTTGCTGAACCTGGGCAAA   | 180   |
| *****          | *****                                                         | ***** |
| XM_025282898.3 | GATGACAACAATCTGTGCCTCCACTTCAACCCTCGTTTCAACGCGCATGGGGACATCAAC  | 240   |
| H              | GATGACAACAATCTGTGCCTCCACTTCAACCCTCGTTTCAACGCGCATGGGGACATCAAC  | 240   |
| RD             | GATGACAACAATCTGTGCCTCCACTTCAACCCTCGTTTCAACGCGCATGGGGACATCAAC  | 240   |
| *****          | *****                                                         | ***** |
| XM_025282898.3 | ACCATTGTGTGTAAACAGCAAGGACGCTGGGGCCTGGGGGACCGAGCAGAGGGAATCTGCC | 300   |
| H              | ACCATTGTGTGTAAACAGCAAGGACGCTGGGGCCTGGGGGACCGAGCAGAGGGAATCTGCC | 300   |
| RD             | ACCATTGTGTGTAAACAGCAAGGACGCTGGGGCCTGGGGGACCGAGCAGAGGGAATCTGCC | 300   |
| *****          | *****                                                         | ***** |
| XM_025282898.3 | TTCCCCCTCCAGCCTGGAAGTGTCTGGAGGTATGCATCTCCTTCGACCAGACAGACCTA   | 360   |
| H              | TTCCCCCTCCAGCCTGGAAGTGTCTGGAGGTATGCATCTCCTTCGACCAGACAGACCTA   | 360   |
| RD             | TTCCCCCTCCAGCCTGGAAGTGTCTGGAGGTATGCATCTCCTTCGACCAGACAGACCTA   | 360   |
| *****          | *****                                                         | ***** |
| XM_025282898.3 | ACCATCAAGCTGCCTGATGGATAACGAATTCAGTT                           | 395   |
| H              | ACCATCAAGCTGCCTGATGGATAACGAATTCAGTT                           | 395   |
| RD             | ACCATCAAGCTGCCTGATGGATAACGAATTCAGTT                           | 395   |
| *****          | *****                                                         | ***** |

**Figure S2.** Analysis of nitrogenous bases matching for DNA in healthy and reproductive disorders affected buffaloes using GenBank gb|XM\_025282898.3| and *LGALS* marker (395-bp) sequences.

|                |                                                                |     |
|----------------|----------------------------------------------------------------|-----|
| NM_001290898.1 | CCATGGCAACCGTACCTGAACCCATCAATGAAATGATGGCCTACTACAGTGACGAGAATG   | 60  |
| H              | CCATGGCAACCGTACCTGAACCCATCAATGAAATGATGGCCTACTACAGTGATGAGAATG   | 60  |
| RD             | CCATGGCAACCGTACCTGAACCCATCAATGAAATGATGGCCTACTACAGTGACGAGAATG   | 60  |
|                | *****                                                          |     |
| NM_001290898.1 | AGCTGTTATTTGAGGCTGATGGCCCCAAACAGATGAAGAGCTGCATCCACACCTGGACC    | 120 |
| H              | AGCTGTTATTTGAGGCTGATGGCCCCAAACAGATGAAGAGCTGCATCCACACCTGGACC    | 120 |
| RD             | AGCTGTTATTTGAGGCTGATGGCCCCAAACAGATGAAGAGCTGCATCCACACCTGGACC    | 120 |
|                | *****                                                          |     |
| NM_001290898.1 | TCGGTTCCATGGGAGATGGAACATCCAGCTGCAGATTCTCACCAGCTCTACAACAAAA     | 180 |
| H              | TCGGTTCCATGGGAGATGGAACATCCAGCTGCAGATTCTCACCAGCTCTACAACAAAA     | 180 |
| RD             | TCGGTTCCATGGGAGATGGAACATCCAGCTGCAGATTCTCACCAGCTCTACAACAAAA     | 180 |
|                | **** *****                                                     |     |
| NM_001290898.1 | GCTTCAGGCAGGTGGTGTGGTTCATTGTGGCCATGGAGAAGCTGAGGAACAGTGCCTACG   | 240 |
| H              | GCTTCAGGCAGGTGGTGTGGTTCATTGTGGCCATGGAGAAGCTGAGGAACAGTGCCTACG   | 240 |
| RD             | GCTTCAGGCAGGTGGTGTGGTTCATTGTGGCCATGGAGAAGCTGAGGAACAGTGCCTACG   | 240 |
|                | *****                                                          |     |
| NM_001290898.1 | CACATGTCTTCCATGATGATGACCTGAGGAGCATCCTTTTCATTTCATCTTTGAAGAAGAGC | 300 |
| H              | CACATGTCTTCCATGATGATGACCTGAGGAGCATCCTTTTCATTTCATCTTTGAAGAAGAGC | 300 |
| RD             | CACATGTCTTCCATGATGATGACCTGAGGAGCATCCTTTTCATTTCATCTTTGAAGAAGAGC | 300 |
|                | *****                                                          |     |
| NM_001290898.1 | CTGTTCATCTTCGAAACGTCCTCCGACGAGTTTCTGTGTGACGCACCCGTGCAGTCAGT    | 358 |
| H              | CTGTTCATCTTCGAAACGTCCTCCGACGAGTTTCTGTGTGACGCACCCGTGCAGTCAGT    | 358 |
| RD             | CTGTTCATCTTCGAAACGTCCTCCGACGAGTTTCTGTGTGACGCACCCGTGCAGTCAGT    | 358 |
|                | *****                                                          |     |

**Figure S3.** Analysis of nitrogenous bases matching for DNA in healthy and reproductive disorders affected buffaloes using GenBank gb|NM\_001290898.1| and *IL1B* marker (358-bp) sequences.

|            |                                                               |     |
|------------|---------------------------------------------------------------|-----|
| HQ889748.1 | CTTGAATCCTCTCGCTGCAACATGAAGGTCTCCGCTGCCCTCCTGTGCCTGCTACTCACA  | 60  |
| H          | CTTGAATCCTCTCGCTGCAACATGAAGGTCTCCGCTGCCCTCCTGTGCCTGCTACTCACA  | 60  |
| RD         | CTTGAATCCTCTCGCTGCAACATGAAGGTCTCCGCTGCCCTCCTGTGCCTGCTACTCACA  | 60  |
|            | *****                                                         |     |
| HQ889748.1 | GTAGCTGCCTTCAGCACCGAGGTGCTCGCTCAGCCAGATGCAATTAACATCCCAAGTCGCC | 120 |
| H          | GTAGCTGCCTTCAGCACCGAGGTGCTCGCTCAGCCAGATGCAATTAACATCCCAAGTCGCC | 120 |
| RD         | GTAGCTGCCTTCAGCACCGAGGTGCTCGCTCAGCCAGATGCAATTAACATCCCAAGTCGCC | 120 |
|            | *****                                                         |     |
| HQ889748.1 | TGCTGCTATACATTCAACAGTAAGAAGATCTCCATGCAGAGGCTGATGAACTACAGAAGA  | 180 |
| H          | TGCTGCTATACATTCAACAGTAAGAAGATCTCCATGCAGAGGCTGATGAACTACAGAAGA  | 180 |
| RD         | TGCTGCTATACATTCAACAGTAAGAAGATCTCCATGCAGAGGCTGATGAACTACAGAAGA  | 180 |
|            | *****                                                         |     |
| HQ889748.1 | GTCACCAGCAGCAAGTGTCCCAAAGAGGCTGTGATTTTCAAGACCGTCCTGGGCAAGGAG  | 240 |
| H          | GTCACCAGCAGCAAGTGTCCCAAAGAGGCTGTGATTTTCAAGACCGTCCTGGGCAAGGAG  | 240 |
| R          | GTCACCAGCAGCAAGTGTCTTAAAGAGGCTGTGATTTTCAAGACCGTCCTGGGCAAGGAG  | 240 |
|            | *****                                                         |     |
| HQ889748.1 | TTATGTGCAGACCCCAAGCAGAAATGGGTCCAGGACTCCATAAACTATCTCAACAAGAAA  | 300 |
| H          | TTATGTGCAGACCCCAAGCAGAAATGGGTCCAGGACTCCATAAACTATCTCAACAAGAAA  | 300 |
| RD         | TTATGTGCAGACCCCAAGCAGAAATGGGTCCAGGACTCCATAAACTATCTCAACAAGAAA  | 300 |
|            | *****                                                         |     |
| HQ889748.1 | AACCAAATCCGAAGCCTTGAGCACTCACTCCACAACCCAAGATCT                 | 347 |
| H          | AACCAAATCCGAAGCCTTGAGCACTCACTCCACAACCCAAGATCT                 | 347 |
| RD         | AACCAAATCCGAAGCCTTGAGCACTCACTCCACAACCCAAGATCT                 | 347 |
|            | *****                                                         |     |

**Figure S4.** Analysis of nitrogenous bases matching for DNA in healthy and reproductive disorders affected buffaloes using GenBank gb|HQ889748.1| and *CCL2* marker (347-bp) sequences.

|                |                                                               |     |
|----------------|---------------------------------------------------------------|-----|
| XM_006056212.4 | CAGCCGGAGCTGCAGAGGATCAGCACGCGGATCGCCAGCCTCTGCCACAGCTACCATG    | 60  |
| H              | CAGCCGGAGCTGCAGAGGATCAGCACGCGGATCGCCAGCCTCTGCCACAGCTACCATG    | 60  |
| RD             | CAGCCGGAGCTGCAGAGGATCAGCACGCGGATCGCCAGCCTCTGCCACAGCTACCATG    | 60  |
|                | *****                                                         |     |
| XM_006056212.4 | AAGGTCTCCGCCGCTGCCCTCGCTGTCTCTGACGGTGGCCGCCCTCTGCGCTCCTGCG    | 120 |
| H              | AAGGTCTCCGCCGCTGCCCTCGCTGTCTCTGACGGTGGCCGCCCTCTGCGCTCCTGCG    | 120 |
| RD             | AAGGTCTCCGCCGCTGCCCTCGCTGTCTCTGACGGTGGCCGCCCTCTGCGCTCCTGCG    | 120 |
|                | *****                                                         |     |
| XM_006056212.4 | TCTGCTCCCATATGCCTCAGACACACGCCCTGCTGCTTTGCCTACATCTCCCGCCCG     | 180 |
| H              | TCTGCTCCCATATGCCTCAGACACACGCCCTGCTGCTTTGCCTACATCTCCCGCCCG     | 180 |
| RD             | TCTGCTCCCATATGCCTCAGACACACGCCCTGCTGCTTTGCCTACATCTCCCGCCCG     | 180 |
|                | *****                                                         |     |
| XM_006056212.4 | CTGCCCCGCACCCACGCTCCAGGAGTATTTCTACACCAGCAGCAAGTGCTCCATGGCAGCA | 240 |
| H              | CTGCCCCGCACCCACGCTCCAGGAGTATTTCTACACCAGCAGCAAGTGCTCCATGGCAGCA | 240 |
| RD             | CTGCCCCGCACCCACGCTCCAGGAGTATTTCTACACCAGCAGCAAGTGCTCCATGGCAGCA | 240 |
|                | *****                                                         |     |
| XM_006056212.4 | GTTGTCTTTATCACCAGGAAGAACCAGGAGTGTGCGCCAACCCAGAGAAGAAGTGGGTG   | 300 |
| H              | GTTGTCTTTATCACCAGGAAGAACCAGGAGTGTGCGCCAACCCAGAGAAGAAGTGGGTG   | 300 |
| RD             | GTTGTCTTTATCACCAGGAAGAACCAGGAGTGTGCGCCAACCCAGAGAAGAAGTGGGTG   | 300 |
|                | *****                                                         |     |
| XM_006056212.4 | CGAGAGTACATCAACGCTTTGGAGTTGAGCTAGGGTGGAGGACGCCTTGAACCTGAACCT  | 360 |
| H              | CGAGAGTACATCAACGCTTTGGAGTTGAGCTAGGGTGGAGGACGCCTTGAACCTGAACCT  | 360 |
| RD             | CGAGAGTACATCAACGCTTTGGAGTTGAGCTAGGGTGGAGGACGCCTTGAACCTGAACCT  | 360 |
|                | *****                                                         |     |
| XM_006056212.4 | GCGCCAACCTCTGCTTCTCGCTCTTGTCTTAAGCAGCTTG                      | 399 |
| H              | GCGCCAACCTCTGCTTCTCGCTCTTGTCTTAAGCAGCTTG                      | 399 |
| RD             | GCGCCAACCTCTGCTTCTCGCTCTTGTCTTAAGCAGCTTG                      | 399 |
|                | *****                                                         |     |

**Figure S5.** Analysis of nitrogenous bases matching for DNA in healthy and reproductive disorders affected buffaloes using GenBank gb|XM\_006056212.4| and *RANTES* marker (399-bp) sequences.

|                |                                                              |     |
|----------------|--------------------------------------------------------------|-----|
| XR_006551148.1 | AGAGCACAGACACAGAGCGGGCGCCTGGCAACGACACCTTCTACTCACCGGGCTCCAGCC | 60  |
| H              | AGAGCACAGACACAGAGCGGGCGCCTGGCAACGACACCTTCTACTCACCGGGCTCCAGCC | 60  |
| RD             | AGAGCACAGACACAGAGCGGGCGCCTGGCAACGACACCTTCTACTCACCGGGCTCCAGCC | 60  |
|                | *****                                                        |     |
| XR_006551148.1 | TGGATGTACCTTCCGCTCCGACTACTCCAACGAGAAGCAGTTACAGGCTTCGAGGCCT   | 120 |
| H              | TGGATGTACCTTCCGCTCCGACTACTCCAACGAGAAGCAGTTACAGGCTTCGAGGCCT   | 120 |
| RD             | TGGATGTACCTTCCGCTCCGACTACTCCAACGAGAAGCAGTTACAGGCTTCGAGGCCT   | 120 |
|                | *****                                                        |     |
| XR_006551148.1 | TCTACTCTGCAGAGGACATTGACGAGTGCCAGGTGCCCCAGGAGAGGCCCCACCTGCG   | 180 |
| H              | TCTACTCTGCAGAGGACATTGACGAGTGCCAGGTGCCCCAGGAGAGGCCCCACCTGCG   | 180 |
| RD             | TCTACTCTGCAGAGGACATTGACGAGTGCCAGGTGCCCCAGGAGAGGCCCCACCTGCG   | 180 |
|                | *****                                                        |     |
| XR_006551148.1 | ACCACCACTGCCACAACCACCTGGGCGGCTTCTACTGCTCCTGCCGTGTGGGCTATGTTT | 240 |
| H              | ACCACCACTGCCACAACCACCTGGGCGGCTTCTACTGCTCCTGCCGTGTGGGCTATGTTT | 240 |
| RD             | ACCACCACTGCCACAACCACCTGGGCGGCTTCTACTGCTCCTGCCGTGTGGGCTATGTTT | 240 |
|                | *****                                                        |     |
| XR_006551148.1 | TCCACAGGAACAGCGCACCTGCTCAGATTCAAACAGACAGGCGGAATACGGCCCGTTT   | 300 |
| H              | TCCACAGGAACAGCGCACCTGCTCAGATTCAAACAGACAGGCGGAATACGGCCCGTTT   | 300 |
| RD             | TCCACAGGAACAGCGCACCTGCTCAGATTCAAACAGACAGGCGGAATACGGCCCGTTT   | 300 |
|                | *****                                                        |     |
| XR_006551148.1 | TGTGGGAAGACATTGCCAGCAGGATTGAAACCAAGAGCAATACCGTGACCATCACCTTT  | 360 |
| H              | TGTGGGAAGACATTGCCAGCAGGATTGAAACCAAGAGCAATACCGTGACCATCACCTTT  | 360 |
| RD             | TGTGGGAAGACATTGCCAGCAGGATTGAAACCAAGAGCAATACCGTGACCATCACCTTT  | 360 |
|                | *****                                                        |     |
| XR_006551148.1 | ACCACCGATCAGTCGGGGGACCATGCGCTGGAAGGTCCGATACACAGCACAGACTTG    | 420 |
| H              | ACCACCGATCAGTCGGGGGACCATGCGCTGGAAGGTCCGATACACAGCACAGACTTG    | 420 |
| RD             | ACCACCGATCAGTCGGGGGACCATGCGCTGGAAGGTCCGATACACAGCACAGACTTG    | 420 |
|                | *****                                                        |     |
| XR_006551148.1 | CCTGCTGTAGACCACAGCCAAACCCATACGTCTCATTTCTTGCTCAGCTGAGCCTTGCC  | 480 |
| H              | CCTGCTGTAGACCACAGCCAAACCCATACGTCTCATTTCTTGCTCAGCTGAGCCTTGCC  | 480 |
| RD             | CCTGCTGTAGACCACAGCCAAACCCATACGTCTCATTTCTTGCTCAGCTGAGCCTTGCC  | 480 |
|                | *****                                                        |     |
| XR_006551148.1 | CTGATCCATTGGCGCCACCTAATGGCCGCATCT                            | 513 |
| H              | CTGATCCATTGGCGCCACCTAATGGCCGCATCT                            | 513 |
| RD             | CTGATCCATTGGCGCCACCTAATGGCCGCATCT                            | 513 |
|                | *****                                                        |     |

**Figure S6.** Analysis of nitrogenous bases matching for DNA in healthy and reproductive disorders affected buffaloes using GenBank gb|XR\_006551148.1| and *MASP2* marker (513-bp) sequences.

|                |                                                               |     |
|----------------|---------------------------------------------------------------|-----|
| XM_006078587.2 | CGCTGGCTGGAGAGTAATGTTACAGAGCGGAGAGAGTGAGGAGGCTGCGTCTGGCTCCCG  | 60  |
| H              | CGCTGGCTGGAGAGTAATGTTACAGAGCGGAGAGAGTGAGGAGGCTGCGTCTGGCTCCCG  | 60  |
| RD             | CGCTGGCTGGAGAGTAATGTTACAGAGCGGAGAGAGTGAGGAGGCTGCGTCTGGCTCCCG  | 60  |
|                | *****                                                         |     |
| XM_006078587.2 | CTCTCACAGCCATTGCAGTACATTGAGCTCCATAGAGACAGCGCCGGGCAAGTGAGAGC   | 120 |
| H              | CTCTCACAGCCATTGCAGTACATTGAGCTCCATAGAGACAGCGCCGGGCAAGTGAGAGC   | 120 |
| RD             | CTCTCACAGCCATTGCAGTACATTGAGCTCCATAGAGACAGCGCCGGGCAAGTGAGAGC   | 120 |
|                | *****                                                         |     |
| XM_006078587.2 | CGGACGGGCACTGGGCGACTCTGTGCCTCGCGGAGGAAAAATAATTAACATGGGCAAG    | 180 |
| H              | CGGACGGGCACTGGGCGACTCTGTGCCTCGCGGAGGAAAAATAATTAACATGGGCAAG    | 180 |
| RD             | CGGACGGGCACTGGGCGACTCTGTGCCTCGCGGAGGAAAAATAATTAACATGGGCAAG    | 180 |
|                | *****                                                         |     |
| XM_006078587.2 | GAGATCCTAAGAAGCCGAGAGGCAAAATGTCATCATATGCATTCTTCGTGCAAACTTGCC  | 240 |
| H              | GAGATCCTAAGAAGCCGAGAGGCAAAATGTCATCATATGCATTCTTCGTGCAAACTTGCC  | 240 |
| RD             | GAGATCCTAAGAAGCCGAGAGGCAAAATGTCATCATATGCATTCTTCGTGCAAACTTGCC  | 240 |
|                | *****                                                         |     |
| XM_006078587.2 | GGGAGGAGCACAAGAAGAAGCACC CGGATGCTTCCGTCAACTTCTCAGAGTTTTCTAAGA | 300 |
| H              | GGGAGGAGCACAAGAAGAAGCACC CGGATGCTTCCGTCAACTTCTCAGAGTTTTCTAAGA | 300 |
| RD             | GGGAGGAGCACAAGAAGAAGCACC CGGATGCTTCCGTCAACTTCTCAGAGTTTTCTAAGA | 300 |
|                | *****                                                         |     |
| XM_006078587.2 | AGTGCTCAGAGAGGTGGAAGACCATGTCTGCTAAAGAGAAAGGAAAATTTGAAGACATGG  | 360 |
| H              | AGTGCTCAGAGAGGTGGAAGACCATGTCTGCTAAAGAGAAAGGAAAATTTGAAGACATGG  | 360 |
| RD             | AGTGCTCAGAGAGGTGGAAGACCATGTCTGCTAAAGAGAAAGGAAAATTTGAAGACATGG  | 360 |
|                | *****                                                         |     |
| XM_006078587.2 | CAAAGGCGGACAAGGCCCGTTATGAAAGAGAAATGAAAACCTATATTCCTCCTAAAGGGG  | 420 |
| H              | CAAAGGCGGACAAGGCCCGTTATGAAAGAGAAATGAAAACCTATATTCCTCCTAAAGGGG  | 420 |
| RD             | CAAAGGCGGACAAGGCCCGTTATGAAAGAGAAATGAAAACCTATATTCCTCCTAAAGGGG  | 420 |
|                | *****                                                         |     |
| XM_006078587.2 | AAACAAAAAAGAGTTCAAGGATCCCAATGCACCCAGAGGCGCTCCTTCGGCCTTTTTCT   | 480 |
| H              | AAACAAAAAAGAGTTCAAGGATCCCAATGCACCCAGAGGCGCTCCTTCGGCCTTTTTCT   | 480 |
| RD             | AAACAAAAAAGAGTTCAAGGATCCCAATGCACCCAGAGGCGCTCCTTCGGCCTTTTTCT   | 480 |
|                | *****                                                         |     |
| XM_006078587.2 | TGTTTTGTTCTGAGTATCGTCCAAAAATCAAAGGCGAACATCCTGGCCTGTCTATTGGTG  | 540 |
| H              | TGTTTTGTTCTGAGTATCGTCCAAAAATCAAAGGCGAACATCCTGGCCTGTCTATTGGTG  | 540 |
| RD             | TGTTTTGTTCTGAGTATCGTCCAAAAATCAAAGGCGAACATCCTGGCCTGTCTATTGGTG  | 540 |
|                | *****                                                         |     |

**Figure S7.** Analysis of nitrogenous bases matching for DNA in healthy and reproductive disorders affected buffaloes using GenBank gb|XM\_006078587.2| and *HMBG1* marker (540-bp) sequences.

```

EF535848.1      TCTGGACATTGACTTCTCAGTCAACATGAAGGCTCTCATTATTCTGGGGTTTCTCTTCC 60
H              TCTGGACATTGACTTCTCAGTCAACATGAAGACTCTCATTATTCTGGGGTTTCTCTTCC 60
RD            TCTGGACATTGACTTCTCAGTCAACATGAAGGCTCTCATTATTCTGGGGTTTCTCTTCC 60
*****

EF535848.1      TTTCTGTTGCTGTCCAAGGCAAGGTCCTTGAGAGATGTGAGCTTGCCAGAACGCTGAAGA 120
H              TTTCTGTTGCTGTCCAAGGCAAGGTCCTTGAGAGATGTGAGCTTGCCAGAACGCTGAAGA 120
RD            TTTCTGTTGCTGTCCAAGGCAAGGTCCTTGAGAGATGTGAGCTTGCCAGAACGCTGAAGA 120
*****

EF535848.1      AACTTGGACTGGACGGCTATAAGGGAGTCAGCCTGGCGAACTGGTTGTGTTTGACCAAAT 180
H              AACTTGGACTGGACGGCTATAAGGGAGTCAGCCTGGCGAACTGGTTGTGTTTGACCAAAT 180
RD            AACTTGGACTGGACGGCTATAAGGGAGTCAGCCTGGCGAACTGGTTGTGTTTGACCAAAT 180
*****

EF535848.1      GGGAAAGCAGTTATAACACAAAAGCTACAACTACAATCCTAGCAGTGAAGCACTGATT 240
H              GGGAAAGCAGTTATAACACAAAAGCTACAACTACAATCCTAGCAGTGAAGCACTGATT 240
RD            GGGAAAGCAGTTATAACACAAAAGCTACAACTACAATCCTGGCAGTGAAGCACTGATT 240
*****

EF535848.1      ATGGGATATTCAGATCAACAGCAAATGGTGGTGTAAATGATGGCAAACCCCTAACGCAG 300
H              ATGGGATATTCAGATCAACAGCAAATGGTGGTGTAAATGATGGCAAACCCCTAACGCAG 300
RD            ATGGGATATTCAAATCAACAGCAAATGGTGGTGTAAATGATGGCAAACCCCTAACGCAG 300
*****

EF535848.1      TTGACGGCTGTCATGTATCCTGCAGCGAATTAATGGAAAATGACATCGCTAAAGCTGTAG 360
H              TTGACGGCTGTCATGTATCCTGCAGCGAATTAATGGAAAATGACATCGCTAAAGCTGTAG 360
RD            TTGACGGCTGTCATGTATCCTGCAGCGAATTAATGGAAAATGACATCGCTAAAGCTGTAG 360
*****

EF535848.1      CCTGTGCAAAGCAGATCGTCAGTGAGCAAGGCATTACAGCATGGGTGGCATGGAAAAGTC 420
H              CCTGTGCAAAGCAGATCGTCAGTGAGCAAGGCATTACAGCATGGGTGGCATGGAAAAGTC 420
RD            CCTGTGCAAAGCAGATCGTCAGTGAGCAAGGCATTACAGCATGGGTGGCATGGAAAAGTC 420
*****

EF535848.1      ATTGTCGAGACCATGACGTCAGCAGTTACATTGAG          455
H              ATTGTCGAGACCATGACGTCAGCAGTTACATTGAG          455
RD            ATTGTCGAGACCATGACGTCAGCAGTTACATTGAG          455
*****

```

**Figure S8.** Analysis of nitrogenous bases matching for DNA in healthy and reproductive disorders affected buffaloes using GenBank gb|EF535848.1| and S-LZ marker (455-bp) sequences.
